# Supplementary material for: Effects of Maresin 1 (MaR1) on Colonic Inflammation and Gut Dysbiosis in Diet-Induced Obese Mice
Source: PubMed Central journal article supplement (PMC7465372; doi:10.3390/microorganisms8081156), 2020-07-30
Supplement: microorganisms-08-01156-s001.pdf [file microorganisms-08-01156-s001.pdf]

Supplementary Materials:

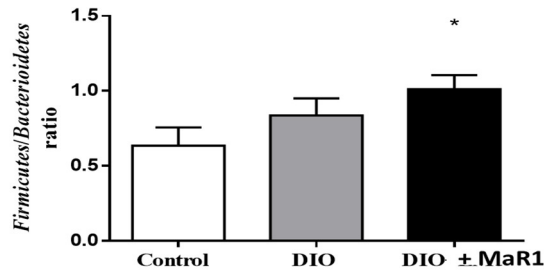

**Figure S1.** *Firmicutes/Bacteroidetes* ratio in Control and DIO mice treated by oral gavage with Maresin 1 (MaR1; 50 µg/kg/day) or treated with vehicle for 10 days. Data are expressed as mean ± SE (n=7-8). (□) Control; (■) DIO; (■) DIO+ MaR1. \* $p < 0.05$  vs. Control.

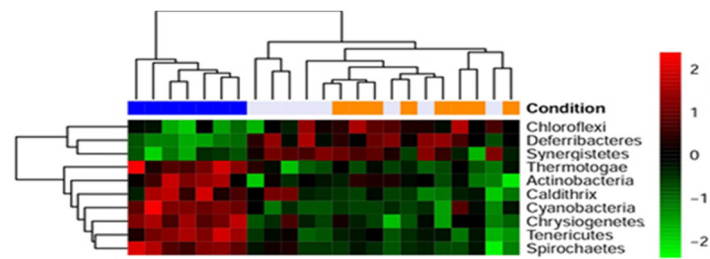

**Figure S2.** Heat map illustrating the relative abundance of the most different *Phyla* according to treatment group. (■) Control; (■) DIO; (■) DIO+MaR1. In the heatmap, red and green indicate high and low abundance respectively relative to the mean abundance of all samples for each *Phyla*. DIO mice were treated by oral gavage with Maresin 1 (MaR1; 50 µg/kg/day) for 10 days.

**Table S1.** Taqman assays used for the gene expression analyses.

| <b>Name</b>                               | <b>Gen</b>                     | <b>TaqMan probe</b> |
|-------------------------------------------|--------------------------------|---------------------|
| <b>Interleukin 6</b>                      | <i>Il-6</i>                    | Mm00446190_m1       |
| <b>Interleukin 1 beta</b>                 | <i>Il-1<math>\beta</math></i>  | Mm00434228_m1       |
| <b>Monocyte chemoattractant protein 1</b> | <i>Mcp-1</i>                   | Mm00441242_m1       |
| <b>Tumor Necrosis Factor alpha</b>        | <i>Tnf-<math>\alpha</math></i> | Mm00443258_m1       |
| <b>18S ribosomal RNA</b>                  | <i>18S</i>                     | Mm03928990_g1       |

**Table S2.** Differential bacterial taxonomic profile at the *Phylum* level in DIO *vs.* Control and DIO+MaR1 *vs.* Control mice.

| Down-regulated DIO <i>vs.</i> Control |        |          |                        | Down-regulated DIO+MaR1 <i>vs.</i> Control |          |                        |
|---------------------------------------|--------|----------|------------------------|--------------------------------------------|----------|------------------------|
| <i>Phylum</i>                         | LogFC  | <i>p</i> | adj.<br><i>p</i> Value | LogFC                                      | <i>p</i> | adj.<br><i>p</i> Value |
| <i>Tenericutes</i>                    | -3.316 | <0.001   | <0.001                 | -3.542                                     | <0.001   | <0.001                 |
| <i>Caldithrix</i>                     | -2.358 | 0.001    | 0.003                  | -1.894                                     | 0.005    | 0.011                  |
| <i>Spirochaetes</i>                   | -2.217 | <0.001   | <0.001                 | -2.160                                     | <0.001   | <0.001                 |
| <i>Verrucomicrobia</i>                | -1.862 | 0.050    | 0.087                  | -2.468                                     | 0.011    | 0.022                  |
| <i>Chrysiogenetes</i>                 | -1.470 | <0.001   | <0.001                 | -1.539                                     | <0.001   | <0.001                 |
| <i>Thermotogae</i>                    | -1.328 | <0.001   | <0.001                 | -1.610                                     | <0.001   | <0.001                 |
| <i>Cyanobacteria</i>                  | -1.039 | <0.001   | <0.001                 | -1.186                                     | <0.001   | <0.001                 |
| <i>Actinobacteria</i>                 | -0.770 | 0.002    | 0.005                  | -0.743                                     | 0.003    | 0.007                  |

  

| Up-regulated DIO <i>vs.</i> Control |       |          |                        | Up-regulated DIO+ MaR1 <i>vs.</i> Control |          |                        |
|-------------------------------------|-------|----------|------------------------|-------------------------------------------|----------|------------------------|
| <i>Phylum</i>                       | LogFC | <i>p</i> | adj.<br><i>p</i> Value | LogFC                                     | <i>p</i> | adj.<br><i>p</i> Value |
| <i>Proteobacteria</i>               | 0.225 | 0.334    | 0.467                  | 0.480                                     | 0.046    | 0.065                  |
| <i>Firmicutes</i>                   | 0.385 | 0.106    | 0.171                  | 0.556                                     | 0.023    | 0.037                  |
| <i>Chloroflexi</i>                  | 0.605 | 0.003    | 0.007                  | 0.442                                     | 0.025    | 0.037                  |
| <i>Nitrospirae</i>                  | 0.671 | 0.040    | 0.077                  | 0.745                                     | 0.024    | 0.037                  |
| <i>Synergistetes</i>                | 0.935 | 0.005    | 0.011                  | 1.667                                     | <0.001   | <0.001                 |
| <i>Deferribacteres</i>              | 3.508 | <0.001   | <0.001                 | 3.809                                     | <0.001   | <0.001                 |

Negative Log Fold Change (LogFC) was related to lower representation in DIO or DIO+MaR1 compared to Control group, whereas positive LogFC corresponds to those *Phyla* that were increased in DIO or DIO+MaR1 compared with Control mice. *Phyla* were organized by their LogFC. DIO mice were treated by oral gavage with Maresin 1 (MaR1; 50 µg/kg/day) for 10 days.

**Table S3.** Differential bacterial taxonomic profile at the *Genus* level in DIO vs. Control mice.

| Down-regulated in DIO vs. Control |        |                         | Up-regulated in DIO vs. Control |       |          |
|-----------------------------------|--------|-------------------------|---------------------------------|-------|----------|
| <i>Genus</i>                      | LogFC  | <i>p</i>                | <i>Genus</i>                    | LogFC | <i>p</i> |
| <i>Anaeroplasma</i>               | -7.855 | 6.99 ×10 <sup>-11</sup> | <i>Caldilinea</i>               | 0.484 | 0.043    |
| <i>Sutterella</i>                 | -7.764 | 2.98 ×10 <sup>-09</sup> | <i>Moraxella</i>                | 0.641 | 0.033    |
| <i>Johnsonella</i>                | -7.137 | 3.74 ×10 <sup>-17</sup> | <i>Deferribacter</i>            | 0.724 | 0.023    |
| <i>Coprococcus</i>                | -6.327 | 7.67 ×10 <sup>-06</sup> | <i>Methylobacterium</i>         | 0.802 | 0.029    |
| <i>Allobaculum</i>                | -6.151 | 2.27 ×10 <sup>-06</sup> | <i>Ehrlichia</i>                | 0.819 | 0.032    |
| <i>Anaerostipes</i>               | -6.067 | 6.59 ×10 <sup>-11</sup> | <i>Deinococcus</i>              | 0.836 | 0.026    |
| <i>Limnobacter</i>                | -5.800 | 3.63 ×10 <sup>-08</sup> | <i>Microcoleus</i>              | 0.854 | 0.010    |
| <i>Desulfosarcina</i>             | -5.609 | 2.62 ×10 <sup>-08</sup> | <i>Amoebophilus</i>             | 0.889 | 0.005    |
| <i>Brachyspira</i>                | -5.035 | 2.03 ×10 <sup>-11</sup> | <i>Paenibacillus</i>            | 0.900 | 0.002    |
| <i>Bifidobacterium</i>            | -4.636 | 2.78 ×10 <sup>-09</sup> | <i>Streptomyces</i>             | 0.904 | 0.006    |
| <i>Turicibacter</i>               | -4.396 | 6.05 ×10 <sup>-04</sup> | <i>Adlercreutzia</i>            | 0.955 | 0.017    |
| <i>Geobacter</i>                  | -4.185 | 1.26 ×10 <sup>-05</sup> | <i>Dehalobacterium</i>          | 0.969 | 0.029    |
| <i>Roseburia</i>                  | -3.873 | 5.55 ×10 <sup>-04</sup> | <i>Streptococcus</i>            | 1.085 | 0.001    |
| <i>Novispirillum</i>              | -3.805 | 3.41 ×10 <sup>-03</sup> | <i>Oscillospira</i>             | 1.162 | 0.005    |
| <i>Sarcina</i>                    | -3.800 | 1.15 ×10 <sup>-02</sup> | <i>Pseudomonas</i>              | 1.183 | 0.013    |
| <i>Pseudobutyriovibrio</i>        | -3.653 | 1.31 ×10 <sup>-03</sup> | <i>Gluconobacter</i>            | 1.260 | 0.038    |
| <i>Anaerovibrio</i>               | -3.620 | 2.35 ×10 <sup>-08</sup> | <i>Enterobacter</i>             | 1.429 | 0.035    |
| <i>Lachnobacterium</i>            | -3.512 | 1.59 ×10 <sup>-05</sup> | <i>Flavobacterium</i>           | 1.436 | 0.003    |
| <i>Dysgonomonas</i>               | -3.418 | 3.94 ×10 <sup>-11</sup> | <i>Helicobacter</i>             | 1.460 | <0.001   |
| <i>Prostheco bacter</i>           | -3.377 | 2.45 ×10 <sup>-02</sup> | <i>Desulfovibrio</i>            | 1.476 | 0.001    |
| <i>Acholeplasma</i>               | -3.171 | 1.25 ×10 <sup>-04</sup> | <i>Slackia</i>                  | 1.487 | 0.031    |
| <i>Mesoplasma</i>                 | -3.134 | 2.69 ×10 <sup>-04</sup> | <i>Kitasatospora</i>            | 1.496 | 0.016    |
| <i>Luteolibacter</i>              | -3.076 | 4.24 ×10 <sup>-02</sup> | <i>Pedobacter</i>               | 1.502 | <0.001   |
| <i>Legionella</i>                 | -3.049 | 2.62 ×10 <sup>-09</sup> | <i>Chromatium</i>               | 1.520 | 0.002    |
| <i>Uliginosibacterium</i>         | -2.716 | 9.35 ×10 <sup>-06</sup> | <i>Alkaliphilus</i>             | 1.717 | 0.000    |
| <i>Eggerthella</i>                | -2.661 | 7.98 ×10 <sup>-05</sup> | <i>Thermobaculum</i>            | 1.770 | 0.003    |
| <i>Eubacterium</i>                | -2.638 | 6.29 ×10 <sup>-05</sup> | <i>Holdemania</i>               | 1.787 | 0.005    |

Table S3 continuation

| Down-regulated in DIO vs. Control |        |                        | Up-regulated in DIO vs. Control |       |          |
|-----------------------------------|--------|------------------------|---------------------------------|-------|----------|
| <i>Genus</i>                      | LogFC  | <i>p</i>               | <i>Genus</i>                    | LogFC | <i>p</i> |
| <i>Lysobacter</i>                 | -2.603 | 2.01 ×10 <sup>02</sup> | <i>Ruminococcus</i>             | 1.807 | <0.001   |
| <i>Caldithrix</i>                 | -2.444 | 6.28 ×10 <sup>04</sup> | <i>Capnocytophaga</i>           | 1.860 | <0.001   |
| <i>Pectinatus</i>                 | -2.435 | 3.28 ×10 <sup>05</sup> | <i>Segetibacter</i>             | 2.018 | <0.001   |
| <i>Marinitoga</i>                 | -2.371 | 4.30 ×10 <sup>07</sup> | <i>Rhodothermus</i>             | 2.051 | <0.001   |
| <i>Desulfotomaculum</i>           | -2.334 | 2.83 ×10 <sup>04</sup> | <i>Escherichia</i>              | 2.068 | 0.029    |
| <i>Prevotella</i>                 | -2.331 | 1.17 ×10 <sup>02</sup> | <i>Caldanaerobacter</i>         | 2.069 | <0.001   |
| <i>Faecalibacterium</i>           | -2.210 | 1.79 ×10 <sup>04</sup> | <i>Smithella</i>                | 2.196 | <0.001   |
| <i>Parapedobacter</i>             | -2.135 | 2.13 ×10 <sup>05</sup> | <i>Sphaerisporangium</i>        | 2.218 | <0.001   |
| <i>Mannheimia</i>                 | -2.119 | 5.64 ×10 <sup>04</sup> | <i>Corynebacterium</i>          | 2.274 | <0.001   |
| <i>Petrotoga</i>                  | -2.039 | 1.24 ×10 <sup>03</sup> | <i>Gluconacetobacter</i>        | 2.283 | <0.001   |
| <i>Rhodospirillum</i>             | -2.023 | 2.48 ×10 <sup>02</sup> | <i>Lachnospira</i>              | 2.303 | 0.001    |
| <i>Sedimentibacter</i>            | -1.932 | 7.17 ×10 <sup>06</sup> | <i>Rikenella</i>                | 2.325 | <0.001   |
| <i>Heliorestis</i>                | -1.803 | 2.49 ×10 <sup>05</sup> | <i>Odoribacter</i>              | 2.380 | <0.001   |
| <i>Muricauda</i>                  | -1.792 | 1.64 ×10 <sup>06</sup> | <i>Gillisia</i>                 | 2.478 | <0.001   |
| <i>Selenomonas</i>                | -1.762 | 5.57 ×10 <sup>04</sup> | <i>Caloramator</i>              | 2.616 | <0.001   |
| <i>Acinetobacter</i>              | -1.565 | 1.92 ×10 <sup>03</sup> | <i>Vagococcus</i>               | 3.060 | <0.001   |
| <i>Desulfurispirillum</i>         | -1.556 | 1.63 ×10 <sup>05</sup> | <i>Acidaminobacter</i>          | 3.127 | <0.001   |
| <i>Coralimargarita</i>            | -1.516 | 2.01 ×10 <sup>02</sup> | <i>Peptococcus</i>              | 3.289 | <0.001   |
| <i>Microbacterium</i>             | -1.400 | 1.94 ×10 <sup>03</sup> | <i>Enterococcus</i>             | 3.727 | <0.001   |
| <i>Butyrivibrio</i>               | -1.357 | 4.22 ×10 <sup>02</sup> | <i>Bilophila</i>                | 3.758 | <0.001   |
| <i>Stenotrophomonas</i>           | -1.282 | 1.77 ×10 <sup>02</sup> | <i>Mucispirillum</i>            | 3.793 | <0.001   |
| <i>Candidatus Phytoplasma</i>     | -1.249 | 8.32 ×10 <sup>04</sup> | <i>Aquimarina</i>               | 4.552 | <0.001   |
| <i>Butyricimonas</i>              | -1.229 | 5.14 ×10 <sup>03</sup> | <i>Anaerotruncus</i>            | 4.761 | <0.001   |
| <i>Emticicia</i>                  | -1.182 | 5.08 ×10 <sup>03</sup> | <i>Lactococcus</i>              | 8.302 | <0.001   |
| <i>Caldicellulosiruptor</i>       | -1.169 | 3.32 ×10 <sup>03</sup> |                                 |       |          |
| <i>Luteibacter</i>                | -1.165 | 2.26 ×10 <sup>02</sup> |                                 |       |          |
| <i>Kribbella</i>                  | -1.159 | 2.39 ×10 <sup>02</sup> |                                 |       |          |
| <i>Bradyrhizobium</i>             | -1.151 | 1.09 ×10 <sup>03</sup> |                                 |       |          |
| <i>Parabacteroides</i>            | -1.125 | 3.97 ×10 <sup>03</sup> |                                 |       |          |
| <i>Paraprevotella</i>             | -0.982 | 3.58 ×10 <sup>02</sup> |                                 |       |          |
| <i>Dolichospermum</i>             | -0.978 | 2.33 ×10 <sup>02</sup> |                                 |       |          |
| <i>Olivibacter</i>                | -0.975 | 6.84 ×10 <sup>04</sup> |                                 |       |          |
| <i>Marinobacter</i>               | -0.917 | 2.95 ×10 <sup>03</sup> |                                 |       |          |
| <i>Dyadobacter</i>                | -0.877 | 8.02 ×10 <sup>03</sup> |                                 |       |          |
| <i>Ferroidobacterium</i>          | -0.796 | 2.15 ×10 <sup>02</sup> |                                 |       |          |
| <i>Rhodobacter</i>                | -0.786 | 3.47 ×10 <sup>02</sup> |                                 |       |          |
| <i>Thermus</i>                    | -0.742 | 7.25 ×10 <sup>03</sup> |                                 |       |          |

Negative Log Fold Change (LogFC) was related to lower representation in DIO compared to Control whereas Positive LogFC corresponds to those *Genera* that were increased in DIO compared with Control. *Genera* were organized by their LogFC.
